# Supplementary material for: Uncovering Networks from Genome-Wide Association Studies via Circular Genomic Permutation
Source: PubMed Central journal article supplement (PMC3429921; doi:10.1534/g3.112.002618), 2012-09-01
Supplement: supp_2.9.1067_FigureS1.pdf [file supp_2.9.1067_FigureS1.pdf]

## Hypergeometric Vs Permutation p-values

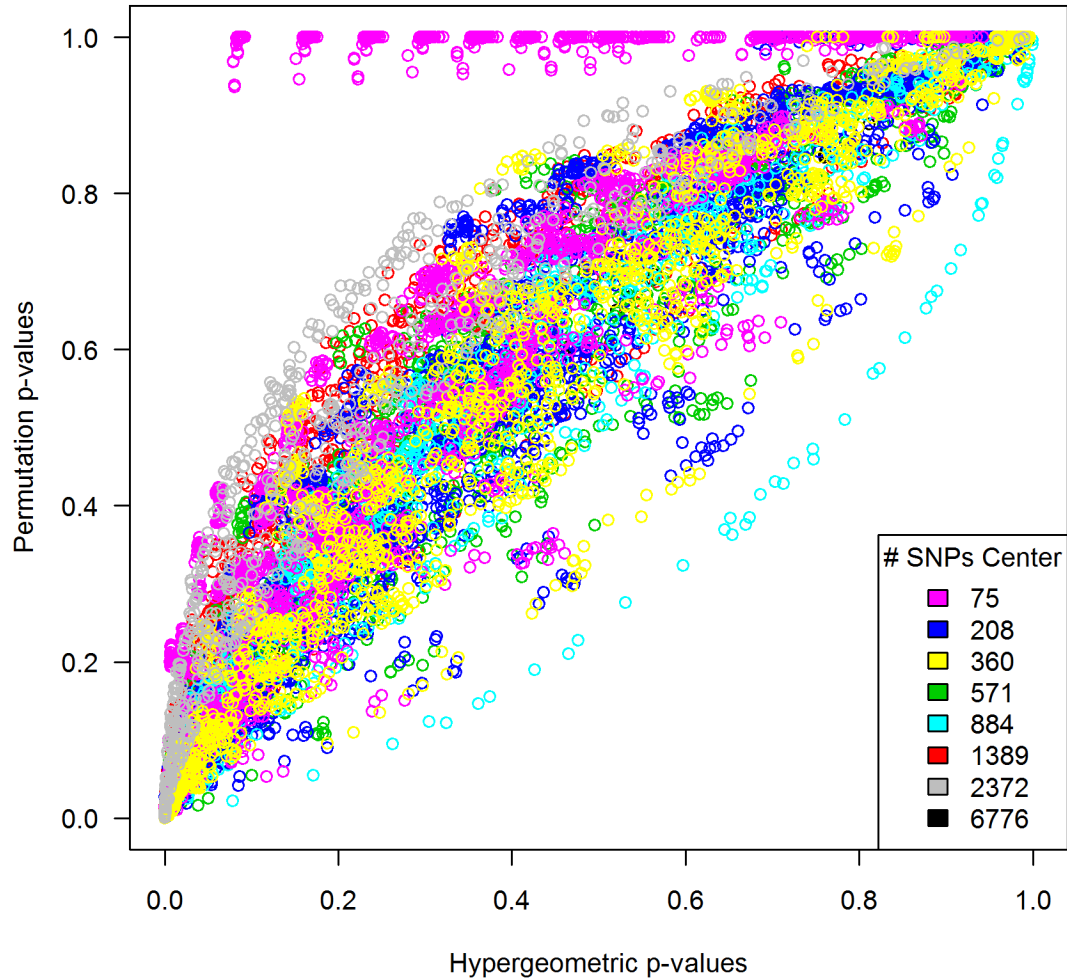

**Figure S1** Hypergeometric-theoretical p-values Vs Hypergeometric-empirical p-values at distance 0. Visual representation of the relationship of the hypergeometric-theoretical p-values (x-axis) compared to the hypergeometric-empirical p-values (y-axis). To assess the effect of the size of the pathway, p-values are colored by the total number of SNPs in the pathway. For this representation pathways were clustered using k-means with 8 groups. The legend represents the centers of that size group. The red line represents the trend which would be followed if the hypergeometric-empirical p-values would match perfectly to those of the hypergeometric-theoretical p-values.
